# Supplementary material for: Moral Distress Scores of Nurses Working in Intensive Care Units for Adults Using Corley’s Scale: A Systematic Review
Source: MDPI journal article supplement (doi:10.3390/ijerph191710640), 2022-08-26
Supplement: s1 [file s1]

PRISMA 2020 flow diagram for new systematic reviews which included searches of databases, registers and other sources

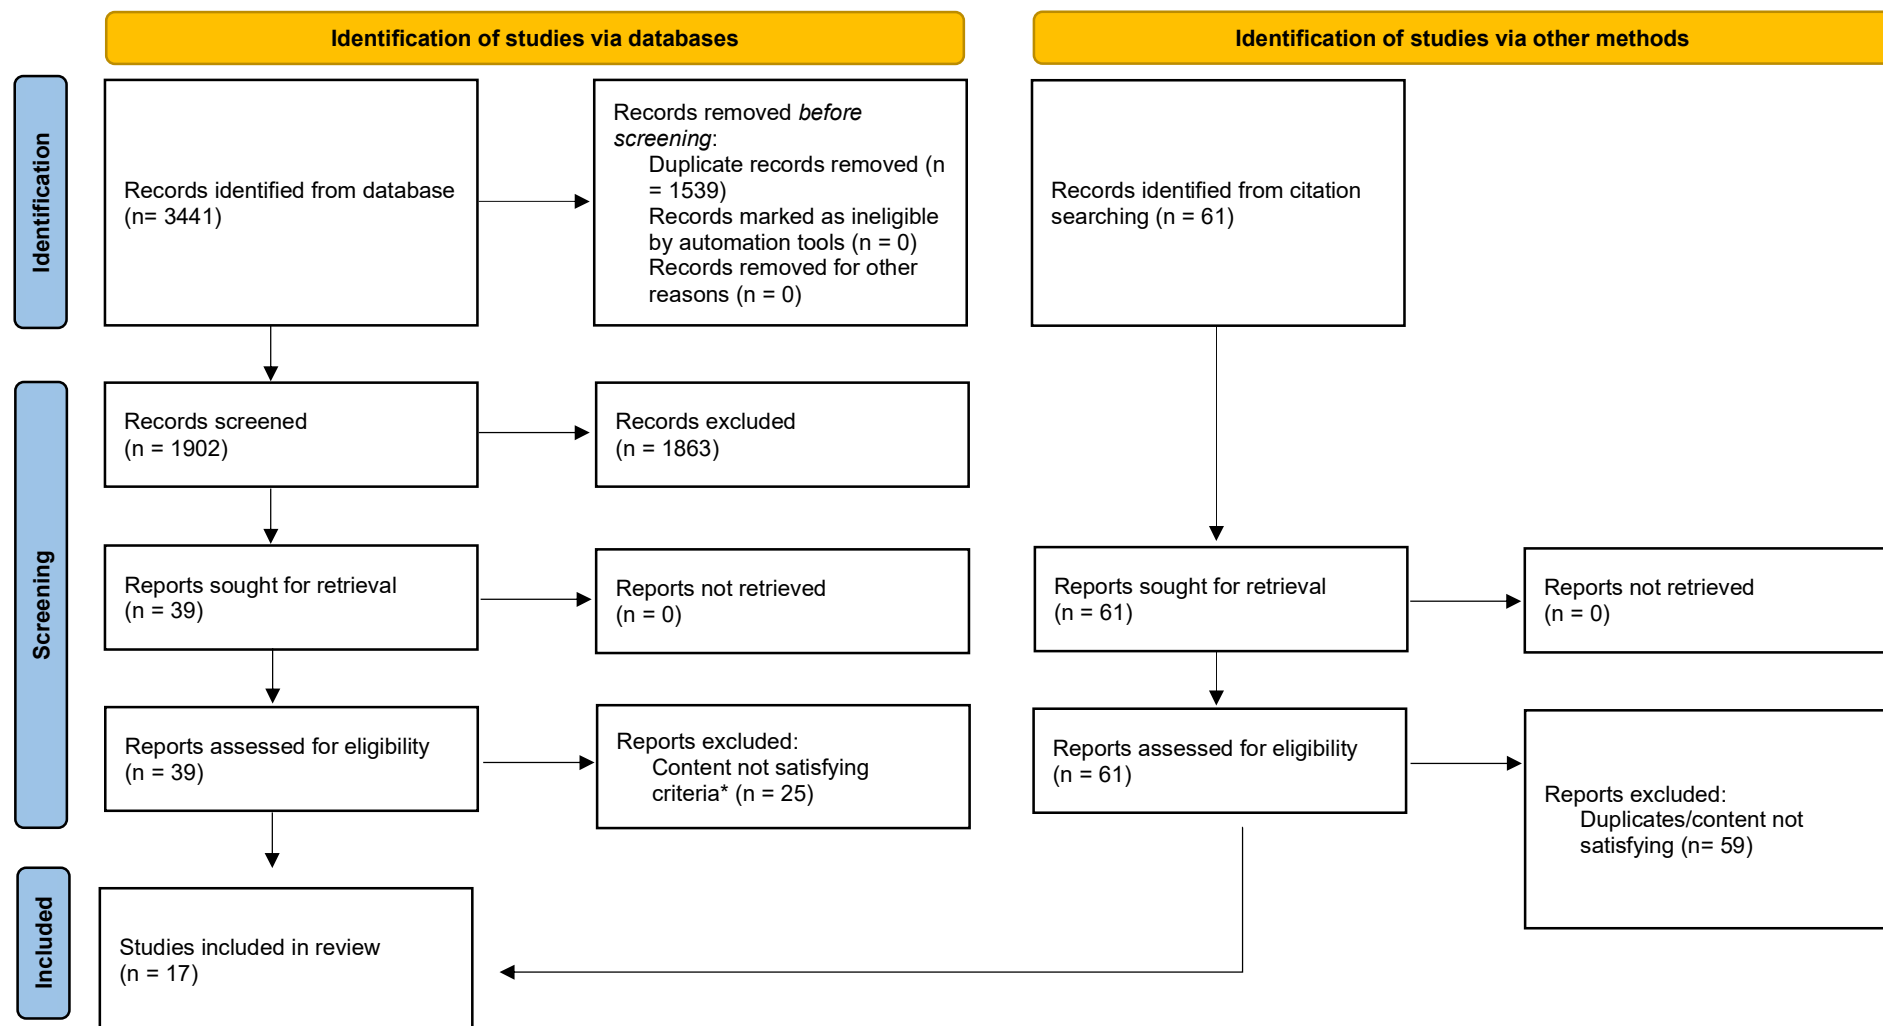

\* Articles with validation, cross-cultural adaptation design or correlational design (n=6)

Articles mainly focusing on registered nurses or other healthcare professionals working in hospitals or primary care (not in Intensive Care Units) (n=14)

Articles mainly focusing on moral distress scores, assessed by another instrument (n=4)

Publications not in English or Italian (n=1)
